# Supplementary material
Source: publisher figshare collection journal article supplement (https://acs.figshare.com/ndownloader/files/28913234)
Supplement: Supplementary file 1 [file 28913234]

**Supplementary Information for**

**Optical Imaging of Chemically and Geometrically Controlled Interfacial  
Diffusion and Redox in 2D van der Waals Space**

Haneul Kang and Sunmin Ryu\*

Department of Chemistry, Pohang University of Science and Technology (POSTECH), Pohang,  
Gyeongbuk 37673, Korea.

\*Correspondence to: [sunryu@postech.ac.kr](mailto:sunryu@postech.ac.kr)

**This PDF file includes:**

Supplementary Figures (S1 to S9)

Supplementary Table (S1)

## Supplementary Figures

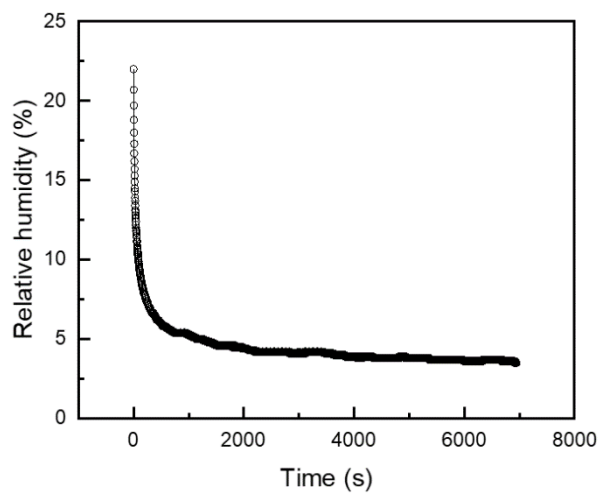

**Figure S1. Change of relative humidity in the optical cell.** Dry Ar gas was introduced at 1,000 mL min<sup>-1</sup> to the air-equilibrated optical gas cell at the time zero.

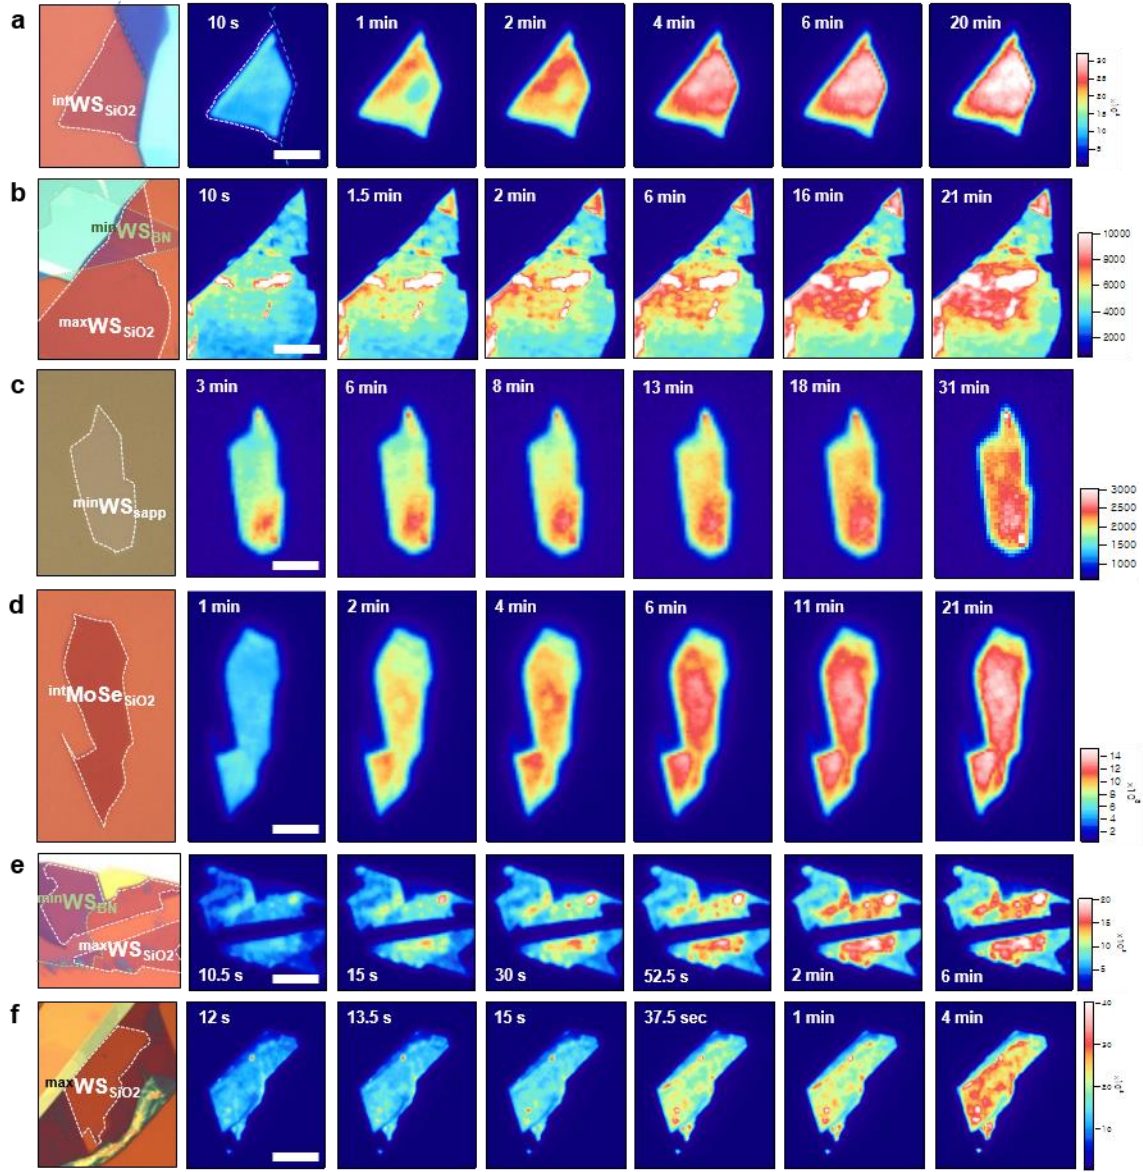

**Figure S2. Raw PL images with optical micrographs.** (a)  $\text{intWSiO}_2$  (corresponding to Fig. 3a), (b)  $\text{maxWSiO}_2$  and  $\text{minWS}_{\text{BN}}$  (Fig. 3b), (c)  $\text{minWS}_{\text{sapp}}$  (Fig. 3c), (d)  $\text{intMoSeSiO}_2$  (Fig. S4c), (e) UVO-treated  $\text{maxWSiO}_2$  and  $\text{minWS}_{\text{BN}}$  (Fig. 4a), and (f) UVO-treated  $\text{maxWSiO}_2$  (Fig. 4b).  $\text{O}_2$ -exposure time is given in each panel. Scale bars are 6, 10, 4, 5, 10, and 7  $\mu\text{m}$ , respectively.

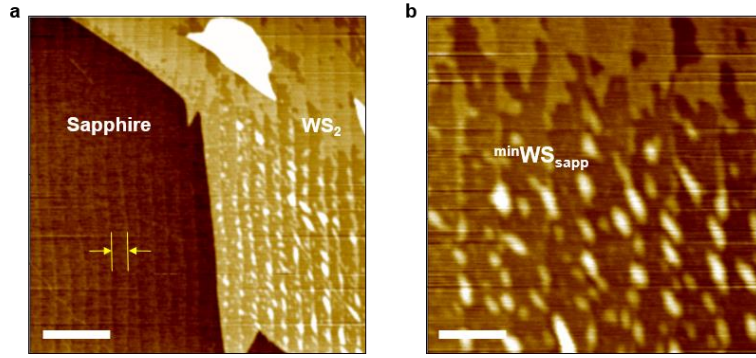

**Figure S3. AFM topographic images of  $\text{minWS}_{\text{sapp}}$ .** The vertical stripes with a spacing of  $\sim 300$  nm (marked with arrows) in (a & b) are due to the steps between (0001) terraces and water layers localized to the step edges. Scale bars are 1.5 and 0.5  $\mu\text{m}$ , respectively.

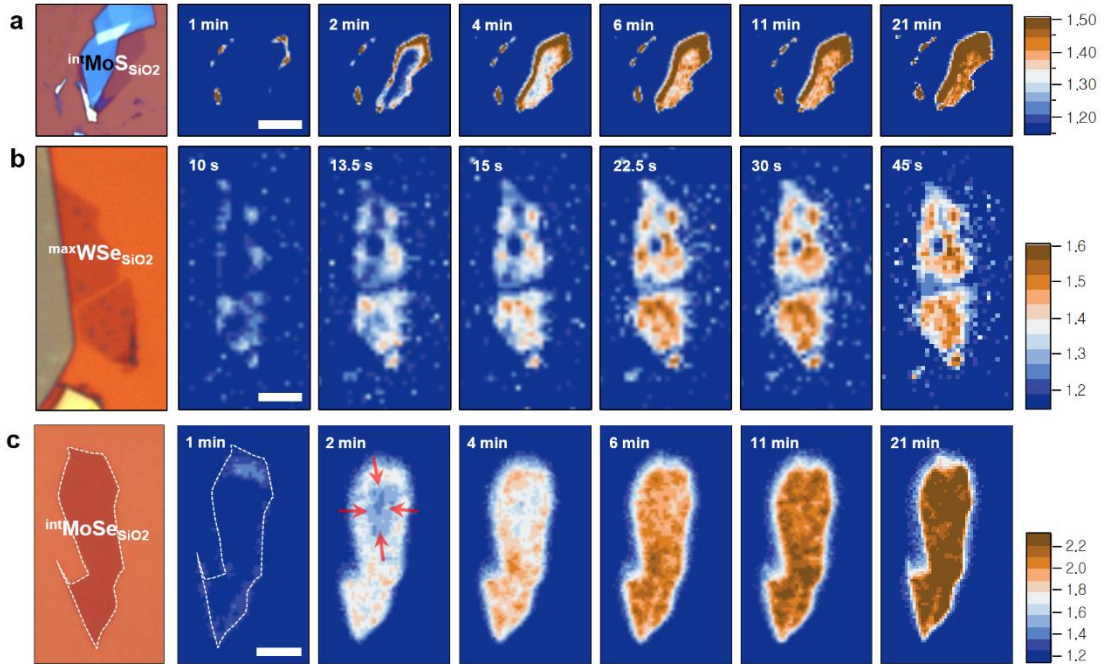

**Figure S4. Diffusion-driven CT in  $\text{MoS}_2$ ,  $\text{WSe}_2$ , and  $\text{MoSe}_2$ .** (a ~ b) Optical micrographs (first column) and time-lapse wide-field PL enhancement images  $\text{intMoS}_{\text{SiO}_2}$  (a),  $\text{maxWSe}_{\text{SiO}_2}$  (b), and  $\text{intMoSe}_{\text{SiO}_2}$  (c).  $\text{O}_2$ -exposure time is given in each panel. Scale bars are 7, 4, and 5  $\mu\text{m}$ , respectively.

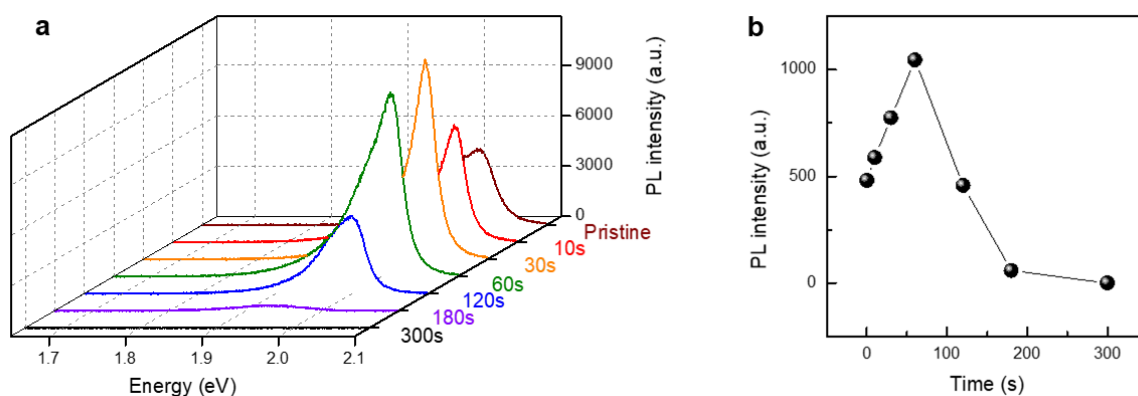

**Figure S5. Effects of UVO treatments on PL spectra of  $\text{intWSiO}_2$ .** (a & b) PL spectra (a) and their integrated PL intensities (b) before and after UVO treatments for various exposure times.

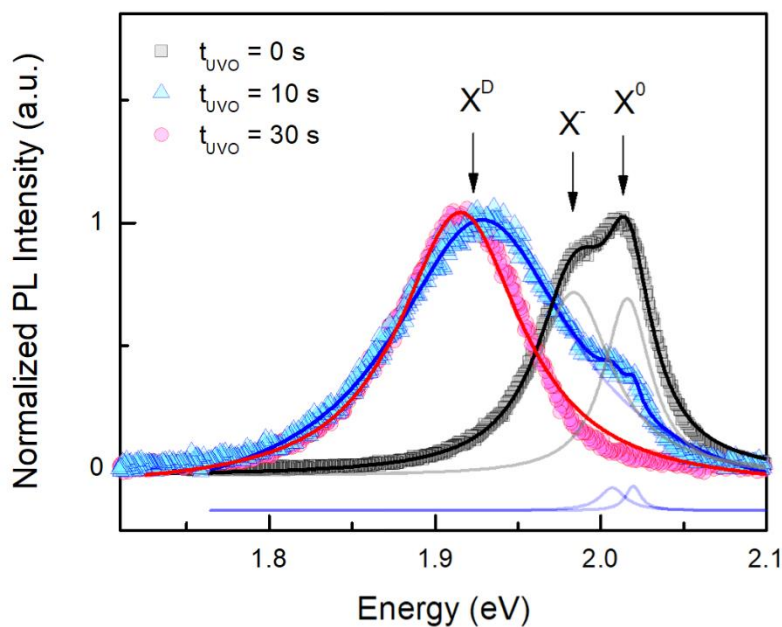

**Figure S6. Defect-induced PL peak of UVO-treated  $\text{intWSiO}_2$ .** The PL spectra obtained before and after UVO treatments were fitted with a triple-Lorentzian function for the defect-induced peak ( $X^D$ ), neutral ( $X^0$ ), and charged excitons ( $X^-$ ).

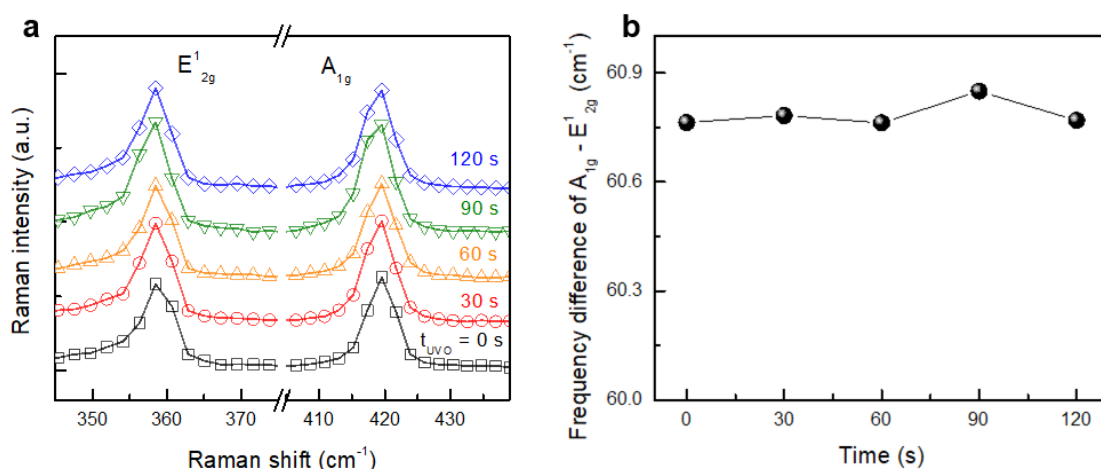

**Figure S7. Effects of UVO treatments on Raman spectra of <sup>int</sup>WSiO<sub>2</sub>.** (a & b) Raman spectra (a) and frequency difference between E<sub>2g</sub><sup>1</sup> and A<sub>1g</sub> (b) before and after UVO treatments for various exposure times. Solid lines are double-Lorentzian fits.

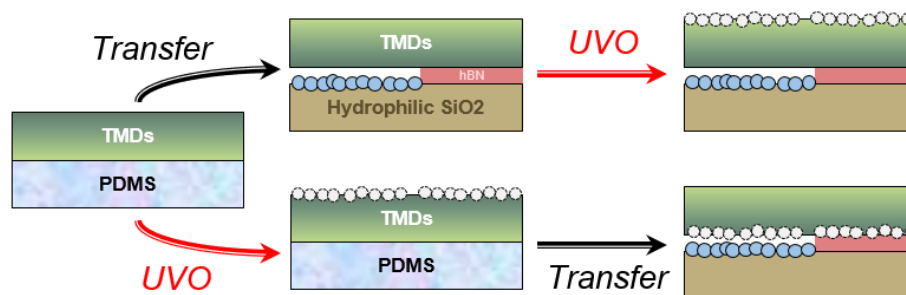

**Figure S8. Schematic procedure to prepare <sup>max</sup>MXSiO<sub>2</sub> samples with either TMD surface UVO-treated.**

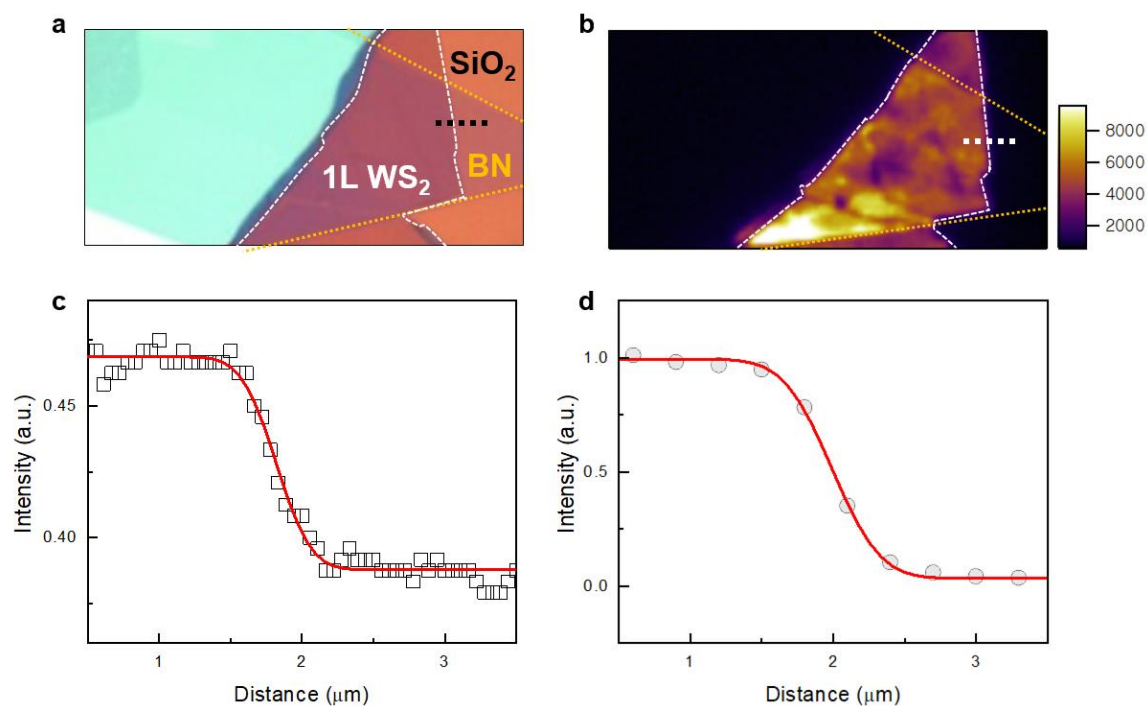

**Figure S9. Spatial resolution of wide-field images.** (a ~ b) Optical micrograph using a 100X objective (a) and wide-field PL image using a 40X objective (b). (c & d) Intensity profiles extracted from the dashed lines in (a) for red-channel and (b), respectively. The FWHM of Gaussian edge response function (fits in solid red line) was 380 and 530 nm, respectively.

## Supplementary Table

**Table S1. Change in the electron density of various WS<sub>2</sub> samples induced by CT**

|                                   | gas conditions    | $I_{X^-}/I_{X0}$ | $E_{\text{diss}}$<br>(meV) | $n_e$ (cm <sup>-2</sup> ) | $\Delta n_e$ (cm <sup>-2</sup> ) |
|-----------------------------------|-------------------|------------------|----------------------------|---------------------------|----------------------------------|
| <sup>max</sup> WS <sub>SiO2</sub> | Ar                | 1.2              | 39                         | $1.3 \times 10^{12}$      | $1.3 \times 10^{12}$             |
|                                   | Ar:O <sub>2</sub> | 0.046            | 33                         | $6.6 \times 10^{10}$      |                                  |
| <sup>int</sup> WS <sub>SiO2</sub> | Ar                | 3.8              | 36                         | $4.9 \times 10^{12}$      | $2.8 \times 10^{12}$             |
|                                   | Ar:O <sub>2</sub> | 1.3              | 32                         | $2.0 \times 10^{12}$      |                                  |
| <sup>min</sup> WS <sub>BN</sub>   | Ar                | 2.4              | 39                         | $2.7 \times 10^{12}$      | $1.9 \times 10^9$                |
|                                   | Ar:O <sub>2</sub> | 2.0              | 34                         | $2.7 \times 10^{12}$      |                                  |
| <sup>min</sup> WS <sub>sapp</sub> | Ar                | 3.6              | 50                         | $2.7 \times 10^{12}$      | $1.4 \times 10^{12}$             |
|                                   | Ar:O <sub>2</sub> | 1.4              | 44                         | $1.3 \times 10^{12}$      |                                  |
